# Supplementary material
Source: publisher site journal article supplement (https://www.dovepress.com/article/426428)
Supplement: Supplementary file 1 [file get_supplementary_file.php]

Table S1. Detailed summary of studies included in our systematic review

| No | Author (year)<br>Case number #                            | Article<br>Type | Country  | Age<br>(Sex) | Other<br>medical<br>condition                   | Vaccine<br>Type<br>(dose) | The time<br>interval<br>from<br>vaccine to<br>symptoms | Eye | Symptoms                                                                   | Baseline<br>BCVA | Eye<br>Examination(s) | Fundal findings                                                                                                                                                                                 | Diagnosis | Outcome                                                                                                                                                                                                                         |
|----|-----------------------------------------------------------|-----------------|----------|--------------|-------------------------------------------------|---------------------------|--------------------------------------------------------|-----|----------------------------------------------------------------------------|------------------|-----------------------|-------------------------------------------------------------------------------------------------------------------------------------------------------------------------------------------------|-----------|---------------------------------------------------------------------------------------------------------------------------------------------------------------------------------------------------------------------------------|
| 1  | Al-Abri, M., et al. (2021) <sup>23</sup><br>Case #1       | CR              | Oman     | 33<br>(M)    | Mild obese, COVID-19 infection six months prior | mRNA vaccine (I)          | 2 hours                                                | LE  | Painless blurring vision                                                   | 1.0 (20/20)      | IOP, FE, OCT          | Optic disc swelling, diffuse intraretinal hemorrhages in 4 quadrants, tortuous vascular, cotton wool spots in the inferior and superior temporal arcades, intraretinal and subretinal fluid, ME | CRVO      | BCVA remained 1,0 (20/20), and resolution of ME at 4 weeks follow up after Rivaroxaban 15mg every 12 hr for 3 weeks followed by 20mg once daily thereafter, and followed by intravitreal injection of aflibercept 2mg in 0.05ml |
| 2  | Bialasiewicz, A A, et al. (2021) <sup>24</sup><br>Case #2 | CR              | Qatar    | 50<br>(M)    | Atopic dermatitis                               | mRNA vaccine (II)         | 15 minutes                                             | LE  | Retrolubar pain, red eye, vision reduction                                 | 0,5 (20/40)      | FE, FA, OCT, VF       | mild optic disc swelling, mild macular hemorrhages, CME, inferonasal VF defect                                                                                                                  | CRVO      | Significant improvement of ME and BCVA (1,0 or 20/20) on the third day after acetylsalicylic acid 100mg/d and accompanied by intravitreal injection of aflibercept once a month                                                 |
| 3  | Endo, B., et al. (2021) <sup>25</sup><br>Case #3          | CR              | Colombia | 52<br>(M)    | None                                            | mRNA vaccine (I)          | 15 days                                                | LE  | Sudden blurred vision in the nasal and superotemporal quadrant for one day | 20/20            | FE, FA, OCT           | Minimal dot hemorrhages in upper quadrants, dilated and tortuous veins in 4 quadrants, disperse exudates, occlusion in temporal branch                                                          | CRVO      | BCVA remained (20/20), and significant improvement in hemorrhages after intravitreal injection of                                                                                                                               |

| No | Author (year)<br>Case number #                       | Article<br>Type | Country | Age<br>(Sex) | Other<br>medical<br>condition | Vaccine<br>Type<br>(dose) | The time<br>interval<br>from<br>vaccine to<br>symptoms | Eye | Symptoms                  | Baseline<br>BCVA | Eye<br>Examination(s)  | Fundal findings                                                                                                                                                                               | Diagnosis   | Outcome                                                                                                                                               |
|----|------------------------------------------------------|-----------------|---------|--------------|-------------------------------|---------------------------|--------------------------------------------------------|-----|---------------------------|------------------|------------------------|-----------------------------------------------------------------------------------------------------------------------------------------------------------------------------------------------|-------------|-------------------------------------------------------------------------------------------------------------------------------------------------------|
|    |                                                      |                 |         |              |                               |                           |                                                        |     |                           |                  |                        |                                                                                                                                                                                               |             | dexamethasone 0.4mg/o.1ml followed by intravitreal injection of bevacizumab 2.5mg/0.1ml and oral apixaban                                             |
| 4  | Goyal, M., et al. (2021) <sup>26</sup><br>Case #4    | CR              | India   | 28<br>(M)    | None                          | Viral vector vaccine (II) | 11 days                                                | RE  | Visual deterioration      | 20/32            | IOP, FE, OCT           | Superior hemiretinal vein occlusion with ME                                                                                                                                                   | HRVO        | BCVA improved 3 days after oral prednisolone 40mg daily in tapering doses, and Apixaban 2.5mg twice daily for 6 weeks. Resolution of ME a week after. |
| 5  | Ikegami, Y., et al. (2021) <sup>27</sup><br>Case #5  | CR              | Japan   | 54<br>(F)    | Hypothyroidism                | mRNA vaccine (II)         | 2 days                                                 | RE  | Sudden severe vision loss | No LP            | IOP, FE, OCT, OCTA, FA | Optic disc swelling, widespread flame-shaped hemorrhages in all four quadrants, whitening of the macula, attenuated retinal arteries, absence of vascular flow in foveal and perifoveal areas | CRVO + CRAO | Therapy and outcome are not reported                                                                                                                  |
| 6  | Tanaka, H., et al. (2021) <sup>28</sup><br>Case #6-7 | CR              | Japan   | 71<br>(F)    | BRVO + secondary ME           | mRNA vaccine (I)          | 1 day                                                  | LE  | Vision loss               | 20/30            | UWPC, OCT              | Vein occlusion in the temporal inferior branch, ME                                                                                                                                            | BRVO        | Resolution of ME after intravitreal injection of aflibercept and significant improvement                                                              |

| No | Author (year)<br>Case number #                           | Article<br>Type | Country           | Age<br>(Sex) | Other<br>medical<br>condition | Vaccine<br>Type<br>(dose)         | The time<br>interval<br>from<br>vaccine to<br>symptoms | Eye | Symptoms                                                   | Baseline<br>BCVA | Eye<br>Examination(s) | Fundal findings                                                                                                                                                  | Diagnosis         | Outcome                                                                                                                                                                                                                                                                                                                               |
|----|----------------------------------------------------------|-----------------|-------------------|--------------|-------------------------------|-----------------------------------|--------------------------------------------------------|-----|------------------------------------------------------------|------------------|-----------------------|------------------------------------------------------------------------------------------------------------------------------------------------------------------|-------------------|---------------------------------------------------------------------------------------------------------------------------------------------------------------------------------------------------------------------------------------------------------------------------------------------------------------------------------------|
|    |                                                          |                 |                   |              |                               |                                   |                                                        |     |                                                            |                  |                       |                                                                                                                                                                  |                   | of BCVA<br>(20/20)                                                                                                                                                                                                                                                                                                                    |
|    |                                                          |                 |                   | 74<br>(M)    | BRVO                          | mRNA<br>vaccine<br>(I)            | 2 days                                                 | RE  | Vision loss                                                | 20/25            | UWPC,<br>OCT          | Vein occlusion in<br>the temporal<br>superior branch,<br>ME                                                                                                      | BRVO              | Resolution of<br>ME after 2<br>times of<br>intravitreal<br>ranibizumab                                                                                                                                                                                                                                                                |
| 7  | Cackett, P., et<br>al. (2022) <sup>29</sup><br>Case #8-9 | CR              | United<br>Kingdom | 44<br>(F)    | None                          | Viral<br>vector<br>vaccine<br>(I) | 5 days                                                 | RE  | two episodes<br>of transient<br>painless<br>blurred vision | 6/6<br>(20/20)   | IOP, FE,<br>OCT       | Few scattered<br>flame and blot<br>hemorrhages in<br>all quadrants                                                                                               | CRVO              | Resolution of<br>vein occlusion<br>at 3-month<br>follow up                                                                                                                                                                                                                                                                            |
|    |                                                          |                 |                   | 49<br>(F)    | None                          | Viral<br>vector<br>vaccine<br>(I) | 4 days                                                 | RE  | Blurred vision                                             | 6/12<br>(20/40)  | IOP, FE,<br>OCT       | Few scattered blot<br>hemorrhages in<br>all quadrants,<br>cotton wool spots                                                                                      | CRVO              | Resolution of<br>vein occlusion<br>and BCVA<br>improved (6/6<br>or 20/20) at 3-<br>month follow<br>up                                                                                                                                                                                                                                 |
| 8  | Chen, YC.<br>(2022) <sup>30</sup><br>Case #10            | CR              | Taiwan            | 72<br>(M)    | Elevated D-<br>Dimer          | mRNA<br>vaccine<br>(II)           | 8 days                                                 | RE  | Sudden<br>severe vision<br>loss                            | HM               | IOP, FE,<br>FA, OCT   | Extensive flame-<br>shaped<br>hemorrhages,<br>attenuated retina<br>arteries, retinal<br>detachment,<br>massive<br>subretinal fluid at<br>the macular area,<br>ME | CRVO<br>+<br>CRAO | Significant<br>improvement<br>in BCVA<br>(20/400) and<br>retinal<br>detachment<br>after<br>intravitreal<br>injection of<br>aflibercept<br>2mg/0.05ml<br>and<br>intravenous<br>methylpredniso<br>lone 1g/day for<br>3 days,<br>followed with<br>oral<br>prednisolone<br>1g/kg/day,<br>aspirin, and<br>pan-retinal<br>photocoagulation. |

| No | Author (year)<br>Case number #                                         | Article<br>Type | Country | Age<br>(Sex) | Other<br>medical<br>condition      | Vaccine<br>Type<br>(dose)           | The time<br>interval<br>from<br>vaccine to<br>symptoms | Eye | Symptoms                                        | Baseline<br>BCVA | Eye<br>Examination(s) | Fundal findings                                                                                                                                                                                                        | Diagnosis | Outcome                                                                                                                                                                                                                                                                                                                           |
|----|------------------------------------------------------------------------|-----------------|---------|--------------|------------------------------------|-------------------------------------|--------------------------------------------------------|-----|-------------------------------------------------|------------------|-----------------------|------------------------------------------------------------------------------------------------------------------------------------------------------------------------------------------------------------------------|-----------|-----------------------------------------------------------------------------------------------------------------------------------------------------------------------------------------------------------------------------------------------------------------------------------------------------------------------------------|
| 9  | Dutta Majumder,<br>P., et al.<br>(2022) <sup>31</sup><br>Case #11      | CR              | India   | 28<br>(M)    | None                               | Viral<br>vector<br>vaccine<br>(III) | 25 days                                                | RE  | Painless<br>vision loss                         | 2/60<br>(20/630) | FE, FA,<br>OCT        | Optic disc<br>swelling, tortuous<br>and dilated retinal<br>vein, flame-<br>shaped and dot<br>dot retinal<br>hemorrhages, the<br>extensive cotton<br>wool spot around<br>the posterior pole,<br>subretinal fluid,<br>ME | CRVO      | Resolution of<br>optic disc<br>swelling, ME,<br>and most of<br>the<br>hemorrhages<br>and significant<br>improvement<br>in BCVA (6/9<br>or 20/32) at 1-<br>month follow-<br>up after<br>intravenous<br>methylpredniso<br>lone 1g for 3<br>days followed<br>by oral<br>corticosteroid 1<br>g/kg in<br>tapering dose<br>for 1 month. |
| 10 | Fernández-Vigo,<br>J.I., et al.<br>(2022) <sup>32</sup><br>Case #12-13 | CR              | Spain   | 69<br>(F)    | None                               | Viral<br>vector<br>vaccine<br>(I)   | 10 days                                                | LE  | Asymptomatic                                    | 20/20            | FE, OCT,<br>OCTA      | Branch vein<br>occlusion far from<br>the macula                                                                                                                                                                        | BRVO      | Complete<br>resolution after<br>6 weeks                                                                                                                                                                                                                                                                                           |
|    |                                                                        |                 |         |              | BRVO after<br>the first<br>vaccine | Viral<br>vector<br>vaccine<br>(II)  | 30 days                                                | RE  | Sudden<br>vision loss<br>and central<br>scotoma | 20/100           | FE, OCT,<br>OCTA      | A large number of<br>hemorrhages,<br>retinal<br>detachment, ME                                                                                                                                                         | CRVO      | Resolution of<br>ME and<br>worsened<br>BCVA (20/200)<br>after the first<br>dose of<br>dexamethasone<br>intravitreal<br>implant for 2<br>months,<br>followed by a<br>second dose of<br>a new<br>dexamethasone<br>intravitreal<br>implant for 1<br>month after<br>ME recurred at                                                    |

| No | Author (year)<br>Case number #                           | Article<br>Type | Country | Age<br>(Sex) | Other<br>medical<br>condition | Vaccine<br>Type<br>(dose) | The time<br>interval<br>from<br>vaccine to<br>symptoms | Eye | Symptoms                                      | Baseline<br>BCVA | Eye<br>Examination(s) | Fundal findings                                                                                                                                                                                | Diagnosis   | Outcome                                                                                                                                                                                                                                                                                                                |
|----|----------------------------------------------------------|-----------------|---------|--------------|-------------------------------|---------------------------|--------------------------------------------------------|-----|-----------------------------------------------|------------------|-----------------------|------------------------------------------------------------------------------------------------------------------------------------------------------------------------------------------------|-------------|------------------------------------------------------------------------------------------------------------------------------------------------------------------------------------------------------------------------------------------------------------------------------------------------------------------------|
|    |                                                          |                 |         |              |                               |                           |                                                        |     |                                               |                  |                       |                                                                                                                                                                                                |             | 4 months after the first dose.                                                                                                                                                                                                                                                                                         |
| 11 | Karageorgiou, G. et al. (2022) <sup>33</sup><br>Case #14 | CR              | Greece  | 60 (M)       | None                          | Viral vector vaccine (NR) | 7 days                                                 | RE  | Sudden painless vision loss of 24 hr duration | 20/20            | IOP, FE, FA, OCT      | Optic disc swelling, peripapillary intraretinal hemorrhages, dilated and tortuous veins, intraretinal dot, blot, and flame-shaped hemorrhages in the upper temporal quadrant, intraretinal CME | BRVO        | Intravitreal injection of anti-VEGF was given to treat the ME. The outcome after the therapy was not reported                                                                                                                                                                                                          |
| 12 | Lee, S., et al. (2022) <sup>34</sup><br>Case #15         | CR              | USA     | 34 (M)       | HL, mildly elevated ESR       | mRNA vaccine (II)         | 10-12 days                                             | LE  | Blurred vision and decreased vision           | CF               | FE, FA, OCT           | Optical disc swelling, dilated and tortuous retinal vein, few scattered blot hemorrhages in 4 quadrants, exudative macular detachment on the macula, delayed retinal arterial and vein filling | CRVO + CRAO | The patient was treated with hyperbaric oxygen, followed by intravitreal injection of aflibercept, dexamethasone, bromfenac, and acetazolamide after ME was present, followed by oral methylprednisolone to respond to the mildly elevated ESR. Optic disc swelling worsened, and vision darkened, and the patient was |

| No | Author (year)<br>Case number #                       | Article<br>Type | Country | Age<br>(Sex) | Other<br>medical<br>condition | Vaccine<br>Type<br>(dose) | The time<br>interval<br>from<br>vaccine to<br>symptoms | Eye | Symptoms                            | Baseline<br>BCVA | Eye<br>Examination(s)         | Fundal findings                                                        | Diagnosis | Outcome                                                                                                                                                                                                                                                                                                                                                                                                      |
|----|------------------------------------------------------|-----------------|---------|--------------|-------------------------------|---------------------------|--------------------------------------------------------|-----|-------------------------------------|------------------|-------------------------------|------------------------------------------------------------------------|-----------|--------------------------------------------------------------------------------------------------------------------------------------------------------------------------------------------------------------------------------------------------------------------------------------------------------------------------------------------------------------------------------------------------------------|
|    |                                                      |                 |         |              |                               |                           |                                                        |     |                                     |                  |                               |                                                                        |           | treated with self-administered 80mg/0.8mL of LMWH which was switched to apixaban, followed by a high dose of IV methylprednisolone 1g/day for 3 days. Significant improvement of BCVA (20/30) after the treatment continued with oral prednisolone tapered beginning at 80mg QD, followed by pentoxifylline 400mg BID because of the persistent disc swelling. The patient additionally diagnosed with NAION |
| 13 | Noguchi, K., et al. (2022) <sup>35</sup><br>Case #16 | CR              | Japan   | 46<br>(F)    | None                          | mRNA vaccine (II)         | NR                                                     | RE  | 6-day history of visual disturbance | 12/20<br>(20/32) | FE                            | Dilated and tortuous vein, dispersed dot, and flame-shaped hemorrhages | CRVO      | Resolution of BCVA (20/20) at 3 months follow up after intravitreal injection of ranibizumab                                                                                                                                                                                                                                                                                                                 |
| 14 | Parakh, S., et al. (2022) <sup>36</sup><br>Case #17  | CR              | India   | 31<br>(M)    | Hyperhomocysteinemia          | Viral vector vaccine (I)  | 7 days                                                 | LE  | Painless vision loss                | 6/9<br>(20/32)   | IOP, FE, SW-FAF, SD-OCT, OCTA | Optic disc hyperemia, dilated and tortuous vein, superficial and       | CRVO      | BCVA remained 6/9 (20/32), with a resolution of                                                                                                                                                                                                                                                                                                                                                              |

| No | Author (year)<br>Case number #                       | Article<br>Type | Country | Age<br>(Sex) | Other<br>medical<br>condition | Vaccine<br>Type<br>(dose) | The time<br>interval<br>from<br>vaccine to<br>symptoms | Eye | Symptoms                                                               | Baseline<br>BCVA | Eye<br>Examination(s) | Fundal findings                                                                                                        | Diagnosis | Outcome                                                                                                                                                                                                                                                      |
|----|------------------------------------------------------|-----------------|---------|--------------|-------------------------------|---------------------------|--------------------------------------------------------|-----|------------------------------------------------------------------------|------------------|-----------------------|------------------------------------------------------------------------------------------------------------------------|-----------|--------------------------------------------------------------------------------------------------------------------------------------------------------------------------------------------------------------------------------------------------------------|
|    |                                                      |                 |         |              |                               |                           |                                                        |     |                                                                        |                  |                       | deep intraretinal hemorrhages in 4 quadrants, a few cotton-wool spots, CME                                             |           | CME, and normalized serum homocysteine at 18 months follow up after being treated with oral folic acid B6 and B12 vitamin supplementation, 4 intravitreal injections of anti-VEGF ranibizumab for 8 months, followed by 3 intravitreal anti-VEGF aflibercept |
| 15 | Priluck, A., et al. (2022) <sup>37</sup><br>Case #18 | CR              | USA     | 57<br>(F)    | HTN, dry eye syndrome         | mRNA vaccine (II)         | NR                                                     | LE  | Flashes and floaters                                                   | 20/20            | IOP, FE               | Superotemporal branch retinal vein occlusion, superficial intraretinal hemorrhages scattered along the superior arcade | BRVO      | ME developed and BCVA worsened (20/30) after observation for 5 weeks. Persistent ME and BCVA improved (20/25) after intravitreal injections of aflibercept monthly for 6 months                                                                              |
| 16 | Pur, DR., et al. (2022) <sup>38</sup><br>Case #19    | CR              | Canada  | 34<br>(M)    | None                          | mRNA vaccine (I)          | 2 days                                                 | RE  | Blurred vision in the inferior visual field and intermittent photopsia | 20/20            | FE, FA, OCT           | Dilated and tortuous superior nasal branch retinal vein, multiple retinal hemorrhages, cotton wool spots               | BRVO      | New macular exudates, resolution of intraretinal hemorrhages, and BCVA remained (20/20), and                                                                                                                                                                 |

| No | Author (year)<br>Case number #                       | Article<br>Type | Country | Age<br>(Sex) | Other<br>medical<br>condition | Vaccine<br>Type<br>(dose) | The time<br>interval<br>from<br>vaccine to<br>symptoms | Eye | Symptoms                                                                       | Baseline<br>BCVA | Eye<br>Examination(s) | Fundal findings                                                                                                                                                                                                   | Diagnosis   | Outcome                                                                                                                                             |
|----|------------------------------------------------------|-----------------|---------|--------------|-------------------------------|---------------------------|--------------------------------------------------------|-----|--------------------------------------------------------------------------------|------------------|-----------------------|-------------------------------------------------------------------------------------------------------------------------------------------------------------------------------------------------------------------|-------------|-----------------------------------------------------------------------------------------------------------------------------------------------------|
|    |                                                      |                 |         |              |                               |                           |                                                        |     |                                                                                |                  |                       |                                                                                                                                                                                                                   |             | inferior visual field defect at follow-up after 4, 7, and 10 months.                                                                                |
| 17 | Romano, D., et al. (2022) <sup>39</sup><br>Case #20  | CR              | Italy   | 54<br>(F)    | HTN                           | Viral Vector vaccine (II) | 2 days                                                 | RE  | Painless loss of vision                                                        | 20/400           | FE, FA, OCT           | Retinal hemorrhages in all quadrants, dilated and tortuous retinal vein, optic disc swelling, and diffuse ME                                                                                                      | CRVO        | Significant improvement of BCVA (20/200) after intravitreal implant of dexamethasone and argon laser panretinal photocoagulation.                   |
| 18 | Ruiz, OA., et al. (2022) <sup>40</sup><br>Case #21   | CR              | Spain   | 51<br>(F)    | hypothyroidism                | mRNA vaccine (II)         | 12 days                                                | LE  | Blurred vision and increasing "grey patches" in the left inferior visual field | 8/10 (20/25)     | IOP, FE, OCT          | Optic disc swelling, peripapillary flame-shaped hemorrhages, widespread dot and blot retinal hemorrhages, retinal edema, occlusion in the superior temporal branch of the retinal artery and central retinal vein | CRVO + BRAO | BCVA worsened (3/10 or 20/63) at the one-month follow-up and remained stable at the two-month follow-up.                                            |
| 19 | Sacconi, R., et al. (2022) <sup>41</sup><br>Case #22 | CR              | Italy   | 74<br>(F)    | Breast cancer, AF             | mRNA vaccine (II)         | 48 hours                                               | RE  | Painless vision loss                                                           | 20/32            | IOP, FE, FA, OCT,     | Venous congestion, widespread blot hemorrhages in the inferior quadrants                                                                                                                                          | HRVO        | BCVA worsened (20/40), and CME was present at a 3-week follow-up. BCVA improved (20/32) and the resolution of ME after 2 intravitreal injections of |



| No | Author (year)<br>Case number #                           | Article<br>Type | Country | Age<br>(Sex) | Other<br>medical<br>condition              | Vaccine<br>Type<br>(dose) | The time<br>interval<br>from<br>vaccine to<br>symptoms | Eye | Symptoms                    | Baseline<br>BCVA | Eye<br>Examination(s)  | Fundal findings                                                                                                                                                    | Diagnosis | Outcome                                                                                                                                                                                                                                                       |
|----|----------------------------------------------------------|-----------------|---------|--------------|--------------------------------------------|---------------------------|--------------------------------------------------------|-----|-----------------------------|------------------|------------------------|--------------------------------------------------------------------------------------------------------------------------------------------------------------------|-----------|---------------------------------------------------------------------------------------------------------------------------------------------------------------------------------------------------------------------------------------------------------------|
|    |                                                          |                 |         |              |                                            |                           |                                                        |     |                             |                  |                        |                                                                                                                                                                    |           | ranibizumab at the 5-week examination                                                                                                                                                                                                                         |
| 20 | Sodhi, PK., et al. (2022) <sup>42</sup><br>Case #23      | CR              | India   | 43<br>(M)    | Slightly raised glycosylated hemoglobin    | Viral vector vaccine (I)  | 3 days                                                 | LE  | Sudden painless vision loss | 20/630           | IOP, FE, FA, OCT, OCTA | Optic disc swelling, dilated and tortuous vein veins, dot-blot and flame-shaped hemorrhages across the fundus, enlarged foveal avascular zone, CFT thickening, CME | CRVO      | Significant improvement in BCVA (20/200) and resolution of hemorrhages and exudates, and CFT reduced at 6-month follow-up after intravitreal injection of triamcinolone acetonide (4mg/0.1ml). Neovascularization was found and treated with a targeted laser |
| 21 | Sonawane, N., et al. (2022) <sup>43</sup><br>Case #24-25 | CR              | India   | 50<br>(M)    | DM, elevated blood urea, creatinine, HbA1C | Viral vector vaccine (II) | 4 days                                                 | RE  | Vision loss                 | 6/60 (20/200)    | IOP, FE, OCT           | Optic disc swelling, dilated and tortuous veins, diffuse retinal hemorrhages, CME                                                                                  | CRVO      | The patient was treated with an intravitreal injection of anti-VEGF. No outcome was reported                                                                                                                                                                  |
|    |                                                          |                 |         | 43<br>(F)    | Elevated CRP, Rheumatoid factor, d-Dimer   | Viral vector vaccine (II) | 3 days                                                 | RE  | Sudden vision loss          | 5/60 (20/250)    | IOP, FE, OCT           | Optic disc swelling, tortuous veins, intraretinal hemorrhages in 4 quadrants,                                                                                      | CRVO      | The patient received no treatment (observation only). No outcome was reported                                                                                                                                                                                 |
| 22 | Sugihara, K., et al. (2022) <sup>44</sup><br>Case #26    | CR              | Japan   | 38<br>(M)    | None                                       | mRNA vaccine (II)         | 2 days                                                 | LE  | Vision loss                 | 0.9 (20/25)      | FE, FA, OCT            | Retinal hemorrhages and cotton wool spots in the                                                                                                                   | BRVO      | Improvement in BCVA (1.2 or 20/16) and resolution of                                                                                                                                                                                                          |

| No | Author (year)<br>Case number #                         | Article<br>Type | Country | Age<br>(Sex) | Other<br>medical<br>condition                                                                                                                | Vaccine<br>Type<br>(dose) | The time<br>interval<br>from<br>vaccine to<br>symptoms | Eye | Symptoms        | Baseline<br>BCVA | Eye<br>Examination(s) | Fundal findings                                                        | Diagnosis | Outcome                                                                                                                             |
|----|--------------------------------------------------------|-----------------|---------|--------------|----------------------------------------------------------------------------------------------------------------------------------------------|---------------------------|--------------------------------------------------------|-----|-----------------|------------------|-----------------------|------------------------------------------------------------------------|-----------|-------------------------------------------------------------------------------------------------------------------------------------|
|    |                                                        |                 |         |              |                                                                                                                                              |                           |                                                        |     |                 |                  |                       | superotemporal region of the posterior pole, ME                        |           | retinal hemorrhages and ME at 7 months after the initial visit after 2 intravitreal injections of anti-VEGF 2mg/0.05ml aflibercept. |
| 23 | Takacs, A., et al. (2022) <sup>45</sup><br>Case #27    | CR              | Hungary | 35 (M)       | Serum prothrombin slightly reduced, antithrombin activity slightly elevated, serum homocystein slightly elevated, mild aortic insufficiency. | mRNA vaccine (I)          | 2 weeks                                                | RE  | Visual decrease | 20/40            | OCT                   | Papilledema, cystoid ME, elevated RNFL thickness                       | CRVO      | BCVA improved to 20/20 and ME resolved after an oral ASA (100mg daily) and a single dose of intravitreal anti-VEGF (aflibercept).   |
| 24 | Tanaka, H., et al. (2022) <sup>46</sup><br>Case #28-29 | CR              | Japan   | 50 (F)       | Breast cancer                                                                                                                                | mRNA vaccine (I)          | 3 days                                                 | RE  | Vision loss     | 20/25            | UWPC, OCT, OCTA       | Flame-shaped hemorrhages around the temporal superior retinal vein, ME | BRVO      | Resolution of ME and significant improvement of BCVA (20/20) at 2-month follow-up after 3 doses of intravitreal ranibizumab.        |
|    |                                                        |                 |         | 56 (F)       | None                                                                                                                                         | mRNA vaccine (I)          | 3 days                                                 | RE  | Vision loss     | 13/20 (20/32)    | UWPC, OCT, OCTA       | Flame-shaped hemorrhage around the temporal inferior retinal vein, ME  | BRVO      | Resolution of ME and significant improvement of BCVA (20/20) at 2-month follow-up after 3                                           |

| No | Author (year)<br>Case number #                           | Article<br>Type | Country | Age<br>(Sex) | Other<br>medical<br>condition | Vaccine<br>Type<br>(dose) | The time<br>interval<br>from<br>vaccine to<br>symptoms | Eye | Symptoms                        | Baseline<br>BCVA | Eye<br>Examination(s) | Fundal findings                                   | Diagnosis | Outcome                                                              |
|----|----------------------------------------------------------|-----------------|---------|--------------|-------------------------------|---------------------------|--------------------------------------------------------|-----|---------------------------------|------------------|-----------------------|---------------------------------------------------|-----------|----------------------------------------------------------------------|
|    |                                                          |                 |         |              |                               |                           |                                                        |     |                                 |                  |                       |                                                   |           | doses of intravitreal ranibizumab.                                   |
| 25 | Bolletta, E., et al. (2021) <sup>47</sup><br>Case #30-34 | CS              | Italy   | 39<br>(M)    | None                          | mRNA vaccine (II)         | 30 days                                                | RE  | Decreased vision                | 20/400           | NR                    | NR                                                | CRVO      | Mild improvement of BCVA (20/100) after intravitreal anti-VEGF       |
|    |                                                          |                 |         | 53<br>(F)    | SAH                           | Viral vector vaccine (I)  | 2 days                                                 | LE  | Decreased vision                | 20/100           | NR                    | NR                                                | BRVO      | Partial improvement of BCVA (20/40) after intravitreal anti-VEGF     |
|    |                                                          |                 |         | 61<br>(F)    | None                          | Viral vector vaccine (II) | 2 days                                                 | LE  | Decreased vision                | 20/32            | NR                    | NR                                                | BRVO      | Partial improvement of BCVA (20/25) after intravitreal anti-VEGF     |
|    |                                                          |                 |         | 50<br>(M)    | DM                            | mRNA vaccine (II)         | 3 days                                                 | LE  | Decreased vision                | 20/32            | NR                    | NR                                                | BRVO      | significant improvement of BCVA (20/20) after intravitreal anti-VEGF |
|    |                                                          |                 |         | 48<br>(M)    | SAH                           | mRNA vaccine (II)         | 23 days                                                | LE  | Blurred vision                  | 20/32            | NR                    | NR                                                | BRVO      | significant improvement of BCVA (20/20) after intravitreal anti-VEGF |
| 26 | Girbardt, C., et al. (2021) <sup>48</sup><br>Case #35-36 | CS              | NR      | 81<br>(F)    | HTN                           | mRNA vaccine (II)         | 12 days                                                | RE  | Blurred vision and unsteadiness | 20/400           | FE, FFA, OCT          | Multiple intraretinal hemorrhages                 | RVO + RAO | NR                                                                   |
|    |                                                          |                 |         |              |                               | mRNA vaccine (II)         | 12 days                                                | LE  | NR                              | 20/80            | FE, FFA, OCT          | Hard exudates, centrally localized hemorrhage, ME | BRVO      | The patient received anti-VEGF. The outcome was not reported.        |

| No | Author (year)<br>Case number #                           | Article<br>Type | Country        | Age<br>(Sex) | Other<br>medical<br>condition                                                            | Vaccine<br>Type<br>(dose)         | The time<br>interval<br>from<br>vaccine to<br>symptoms | Eye | Symptoms | Baseline<br>BCVA | Eye<br>Examination(s) | Fundal findings | Diagnosis | Outcome                                                                                         |
|----|----------------------------------------------------------|-----------------|----------------|--------------|------------------------------------------------------------------------------------------|-----------------------------------|--------------------------------------------------------|-----|----------|------------------|-----------------------|-----------------|-----------|-------------------------------------------------------------------------------------------------|
| 27 | Park, HS., et al.<br>(2021) <sup>49</sup><br>Case #37-47 | CS              | South<br>Korea | 68<br>(F)    | Dyslipidemia,<br>vitreous<br>hemorrhage                                                  | Viral<br>vector<br>vaccine<br>(I) | 1 day                                                  | LE  | NR       | HM               | NR                    | NR              | RVO       | The patient<br>was observed.<br>The outcome<br>was not<br>reported.                             |
|    |                                                          |                 |                | 76<br>(M)    | HTN,<br>Cataract,<br>NTG                                                                 | mRNA<br>vaccine<br>(I)            | 3 days                                                 | LE  | NR       | 20/25            | NR                    | NR              | RVO       | The patient<br>was observed.<br>The outcome<br>was not<br>reported.                             |
|    |                                                          |                 |                | 85<br>(F)    | DM, HTN,<br>ESRD,<br>tuberculosis,<br>dementia,<br>vitreous<br>hemorrhage                | mRNA<br>vaccine<br>(II)           | 1 day                                                  | RE  | NR       | CF               | NR                    | NR              | RVO       | The patient<br>received anti-<br>VEGF<br>(Bevacizumab)<br>. The outcome<br>was not<br>reported. |
|    |                                                          |                 |                | 59<br>(M)    | DM, HTN                                                                                  | Viral<br>vector<br>vaccine<br>(I) | 2 days                                                 | LE  | NR       | 20/25            | NR                    | NR              | RVO       | The patient<br>was observed.<br>The outcome<br>was not<br>reported.                             |
|    |                                                          |                 |                | 61<br>(M)    | None                                                                                     | Viral<br>vector<br>vaccine<br>(I) | 2 days                                                 | RE  | NR       | 20/500           | NR                    | NR              | RVO       | The patient<br>received anti-<br>VEGF<br>(Bevacizumab)<br>. The outcome<br>was not<br>reported. |
|    |                                                          |                 |                | 79<br>(M)    | DM, gastric<br>cancer                                                                    | mRNA<br>vaccine<br>(II)           | 2 days                                                 | LE  | NR       | 20/500           | NR                    | NR              | RVO       | The patient<br>received anti-<br>VEGF<br>(Bevacizumab)<br>. The outcome<br>was not<br>reported. |
|    |                                                          |                 |                | 77<br>(F)    | HTN,<br>Hepatitis B<br>Virus Carrier,<br>colon cancer<br>on<br>chemotherapy,<br>cataract | mRNA<br>vaccine<br>(I)            | 16 days                                                | LE  | NR       | 20/25            | NR                    | NR              | RVO       | The patient<br>received anti-<br>VEGF<br>(Bevacizumab)<br>. The outcome<br>was not<br>reported. |

| No | Author (year)<br>Case number #                             | Article<br>Type | Country        | Age<br>(Sex) | Other<br>medical<br>condition                                               | Vaccine<br>Type<br>(dose)          | The time<br>interval<br>from<br>vaccine to<br>symptoms | Eye | Symptoms | Baseline<br>BCVA | Eye<br>Examination(s) | Fundal findings                                   | Diagnosis | Outcome                                                                                         |
|----|------------------------------------------------------------|-----------------|----------------|--------------|-----------------------------------------------------------------------------|------------------------------------|--------------------------------------------------------|-----|----------|------------------|-----------------------|---------------------------------------------------|-----------|-------------------------------------------------------------------------------------------------|
|    |                                                            |                 |                | 63<br>(M)    | DM, DME                                                                     | mRNA<br>vaccine<br>(I)             | 13 days                                                | RE  | NR       | CF               | NR                    | NR                                                | RVO       | The patient<br>received anti-<br>VEGF<br>(Bevacizumab)<br>. The outcome<br>was not<br>reported. |
|    |                                                            |                 |                | 51<br>(F)    | HTN                                                                         | Viral<br>vector<br>vaccine<br>(I)  | 21 days                                                | LE  | NR       | 20/180           | NR                    | NR                                                | RVO       | The patient<br>received anti-<br>VEGF<br>(Bevacizumab)<br>. The outcome<br>was not<br>reported. |
|    |                                                            |                 |                | 81<br>(F)    | HTN,<br>cataract                                                            | mRNA<br>vaccine<br>(I)             | 4 days                                                 | LE  | NR       | 20/63            | NR                    | NR                                                | RVO       | The patient<br>was observed.<br>The outcome<br>was not<br>reported.                             |
|    |                                                            |                 |                | 61<br>(M)    | HTN, uveitis                                                                | Viral<br>vector<br>vaccine<br>(I)  | 3 days                                                 | LE  | NR       | 20/25            | NR                    | NR                                                | RVO       | The patient<br>was observed.<br>The outcome<br>was not<br>reported.                             |
| 28 | Silva, LSC., et<br>al. (2021) <sup>50</sup><br>Case #48-51 | CS              | Brazil         | 66<br>(F)    | Endometrial<br>hypertrophy,<br>overweight,<br>increased<br>apolipoprotein a | Viral<br>vector<br>vaccine<br>(NR) | 16 days                                                | RE  | Headache | NR               | FE, OCT               | Superotemporal<br>intraretinal<br>hemorrhages, ME | BRVO      | NR                                                                                              |
|    |                                                            |                 | Spain          | 51<br>(M)    | COVID-19<br>infection 10<br>months prior                                    | mRNA<br>vaccine<br>(NR)            | 6 days                                                 | LE  | None     | NR               | FE, OCT               | Diffuse intraretinal<br>hemorrhages, ME           | CRVO      | NR                                                                                              |
|    |                                                            |                 | Brazil         | 66<br>(M)    | HTN                                                                         | Viral<br>vector<br>vaccine<br>(NR) | 4 days                                                 | NR  | None     | NR               | NR                    | NR                                                | RVO       | NR                                                                                              |
|    |                                                            |                 | Brazil         | 54<br>(F)    | None                                                                        | Viral<br>vector<br>vaccine<br>(NR) | 10 days                                                | NR  | None     | NR               | NR                    | NR                                                | RVO       | NR                                                                                              |
| 29 | Choi, M., et al.<br>(2022) <sup>51</sup><br>Case #52-59    | CS              | South<br>Korea | 64<br>(M)    | None                                                                        | Viral<br>vector                    | 1 day                                                  | RE  | NR       | 20/25            | NR                    | NR                                                | CRVO      | The patient<br>was observed<br>with aspirin.                                                    |

| No | Author (year)<br>Case number # | Article<br>Type | Country | Age<br>(Sex) | Other<br>medical<br>condition           | Vaccine<br>Type<br>(dose)          | The time<br>interval<br>from<br>vaccine to<br>symptoms | Eye | Symptoms | Baseline<br>BCVA | Eye<br>Examination(s) | Fundal findings        | Diagnosis | Outcome                                                                                     |
|----|--------------------------------|-----------------|---------|--------------|-----------------------------------------|------------------------------------|--------------------------------------------------------|-----|----------|------------------|-----------------------|------------------------|-----------|---------------------------------------------------------------------------------------------|
|    |                                |                 |         |              |                                         | vaccine<br>(I)                     |                                                        |     |          |                  |                       |                        |           | The outcome<br>was not<br>reported                                                          |
|    |                                |                 |         | 33<br>(F)    | None                                    | mRNA<br>vaccine<br>(II)            | 6 days                                                 | RE  | NR       | 20/40            | NR                    | NR                     | CRVO      | The patient<br>received an<br>anti-VEGF<br>injection. The<br>outcome was<br>not reported    |
|    |                                |                 |         | 48<br>(M)    | None                                    | mRNA<br>vaccine<br>(III)           | 6 days                                                 | RE  | NR       | 20/125           | NR                    | NR                     | CRVO      | The patient<br>received an<br>anti-VEGF<br>injection. The<br>outcome was<br>not reported    |
|    |                                |                 |         | 69<br>(F)    | None                                    | Viral<br>vector<br>vaccine<br>(I)  | 3 days                                                 | LE  | NR       | 20/20            | NR                    | NR                     | BRVO      | The patient<br>was observed<br>with aspirin.<br>The outcome<br>was not<br>reported          |
|    |                                |                 |         | 66<br>(M)    | None                                    | Viral<br>vector<br>vaccine<br>(II) | 7 days                                                 | LE  | NR       | 20/20            | NR                    | NR                     | BRVO      | The patient<br>was observed<br>without any<br>treatment. The<br>outcome was<br>not reported |
|    |                                |                 |         | 68<br>(F)    | BRVO                                    | Viral<br>vector<br>vaccine<br>(I)  | 1 day                                                  | RE  | NR       | HM               | NR                    | Vitreous<br>hemorrhage | BRVO      | The patient<br>was observed<br>without any<br>treatment. The<br>outcome was<br>not reported |
|    |                                |                 |         | 74<br>(F)    | HTN, Nasal<br>cavity<br>Cancer,<br>BRVO | Viral<br>vector<br>vaccine<br>(II) | 6 days                                                 | RE  | NR       | HM               | NR                    | Vitreous<br>hemorrhage | BRVO      | The patient<br>received a<br>vitrectomy.<br>The outcome<br>was not<br>reported              |
|    |                                |                 |         | 63<br>(F)    | CRVO                                    | Viral<br>vector<br>vaccine<br>(I)  | 3 days                                                 | LE  | NR       | 20/630           | NR                    | NR                     | CRVO      | The patient<br>received an<br>anti-VEGF<br>injection. The                                   |

| No | Author (year)<br>Case number #                          | Article<br>Type | Country   | Age<br>(Sex) | Other<br>medical<br>condition | Vaccine<br>Type<br>(dose) | The time<br>interval<br>from<br>vaccine to<br>symptoms | Eye | Symptoms            | Baseline<br>BCVA | Eye<br>Examination(s) | Fundal findings | Diagnosis | Outcome                                                                                          |
|----|---------------------------------------------------------|-----------------|-----------|--------------|-------------------------------|---------------------------|--------------------------------------------------------|-----|---------------------|------------------|-----------------------|-----------------|-----------|--------------------------------------------------------------------------------------------------|
|    |                                                         |                 |           |              |                               |                           |                                                        |     |                     |                  |                       |                 |           | outcome was not reported                                                                         |
| 30 | Peters, MC., et al. (2022) <sup>52</sup><br>Case #60-64 | CS              | Australia | 71<br>(M)    | None                          | Viral vector vaccine (I)  | 48 hour                                                | NR  | Visual disturbances | 20/200           | NR                    | ME              | BRVO      | The patient received monthly intravitreal anti-VEGF (Bevacizumab). The outcome was not reported. |
|    |                                                         |                 |           | 58<br>(M)    | Pterygium                     | Viral vector vaccine (I)  | 72 hour                                                | NR  | Visual disturbances | 20/63            | NR                    | ME              | HRVO      | The patient received monthly intravitreal anti-VEGF (Bevacizumab). The outcome was not reported. |
|    |                                                         |                 |           | 73<br>(F)    | Retinal detachment, HTN       | Viral vector vaccine (I)  | 72 hour                                                | NR  | Visual disturbances | 20/63            | NR                    | ME              | BRVO      | The patient received monthly intravitreal anti-VEGF (Aflibercept). The outcome was not reported. |
|    |                                                         |                 |           | 47<br>(F)    | Hyperthyroidism               | mRNA vaccine (I)          | 5 days                                                 | NR  | Visual disturbances | 20/32            | NR                    | ME              | BRVO      | The patient received monthly intravitreal anti-VEGF (Bevacizumab). The outcome was not reported. |
|    |                                                         |                 |           | 36<br>(M)    | None                          | mRNA vaccine (II)         | 24-72 hour                                             | NR  | Visual disturbances | 20/32            | NR                    | ME              | CRVO      | The patient received monthly intravitreal anti-VEGF                                              |

| No | Author (year)<br>Case number #                               | Article<br>Type | Country | Age<br>(Sex) | Other<br>medical<br>condition | Vaccine<br>Type<br>(dose)         | The time<br>interval<br>from<br>vaccine to<br>symptoms | Eye | Symptoms | Baseline<br>BCVA | Eye<br>Examination(s)            | Fundal findings                                                                                     | Diagnosis | Outcome                                                                                                              |
|----|--------------------------------------------------------------|-----------------|---------|--------------|-------------------------------|-----------------------------------|--------------------------------------------------------|-----|----------|------------------|----------------------------------|-----------------------------------------------------------------------------------------------------|-----------|----------------------------------------------------------------------------------------------------------------------|
|    |                                                              |                 |         |              |                               |                                   |                                                        |     |          |                  |                                  |                                                                                                     |           | (Aflibercept).<br>The outcome<br>was not<br>reported.                                                                |
| 31 | Vujosevic, S., et<br>al. (2022) <sup>53</sup><br>Case #65-78 | CS              | Italy   | 69<br>(F)    | DVT                           | Viral<br>vector<br>vaccine<br>(I) | 1 week                                                 | RE  | NR       | 20/32            | IOP, FE,<br>OCT,<br>OCTA,<br>FFA | Hemorrhage +,<br>quadrant<br>ischemia,<br>inferotemporal<br>branch vein<br>occlusion                | BRVO      | BCVA<br>improved<br>(20/20) after<br>receiving laser<br>photocoagulation                                             |
|    |                                                              |                 |         | 82<br>(F)    | None                          | mRNA<br>vaccine<br>(II)           | 2 weeks                                                | RE  | NR       | 20/63            | IOP, FE,<br>OCT,<br>OCTA,<br>FFA | Edema +++,<br>hemorrhages +,<br>quadrant<br>ischemia,<br>inferotemporal<br>branch vein<br>occlusion | BRVO      | BCVA<br>improved<br>(20/40) after<br>receiving<br>steroid<br>treatment                                               |
|    |                                                              |                 |         | 96<br>(F)    | HTN, DM                       | mRNA<br>vaccine<br>(II)           | 1 week                                                 | RE  | NR       | 20/200           | IOP, FE,<br>OCT,<br>OCTA,<br>FFA | Edema +++, SND,<br>hemorrhages ++                                                                   | CRVO      | Persistent<br>BCVA (20/200)<br>after steroid<br>treatment                                                            |
|    |                                                              |                 |         | 91<br>(F)    | None                          | mRNA<br>vaccine<br>(II)           | 1.5 week                                               | LE  | NR       | CF               | IOP, FE,<br>OCT,<br>OCTA,<br>FFA | IOI, edema +++,<br>hemorrhages<br>+++,                                                              | CRVO      | Persistent<br>BCVA (CF) at<br>the last follow-<br>up (unknown<br>time) after the<br>patient refused<br>any treatment |
|    |                                                              |                 |         | 78<br>(F)    | None                          | mRNA<br>vaccine<br>(II)           | 1 week                                                 | RE  | NR       | 20/25            | IOP, FE,<br>OCT,<br>OCTA,<br>FFA | Edema +,<br>hemorrhages +,<br>superotemporal<br>branch retinal vein<br>occlusion                    | BRVO      | BCVA<br>improved<br>(20/20) after<br>receiving anti-<br>VEGF agents                                                  |
|    |                                                              |                 |         |              |                               |                                   | 1 week                                                 | LE  | NR       | 20/20            | IOP, FE,<br>OCT,<br>OCTA,<br>FFA | Hemorrhages +,<br>superotemporal<br>branch retinal vein<br>occlusion                                | BRVO      | BCVA<br>remained<br>20/20 with no<br>treatment                                                                       |
|    |                                                              |                 |         | 70<br>(M)    | None                          | Viral<br>vector<br>vaccine<br>(I) | 1 week                                                 | RE  | NR       | 20/20            | IOP, FE,<br>OCT,<br>OCTA,<br>FFA | Hemorrhages +                                                                                       | CRVO      | BCVA<br>remained<br>20/20 with no<br>treatment                                                                       |
|    |                                                              |                 |         | 40<br>(M)    | Hyperhomocysteinemia          | Viral<br>vector                   | 2 weeks                                                | RE  | NR       | 20/20            | IOP, FE,<br>OCT,                 | Hemorrhages +                                                                                       | BRVO      | BCVA<br>remained                                                                                                     |



| No | Author (year)<br>Case number # | Article<br>Type | Country | Age<br>(Sex) | Other<br>medical<br>condition                        | Vaccine<br>Type<br>(dose)          | The time<br>interval<br>from<br>vaccine to<br>symptoms | Eye | Symptoms | Baseline<br>BCVA | Eye<br>Examination(s)            | Fundal findings                                                                                           | Diagnosis | Outcome                                                                    |
|----|--------------------------------|-----------------|---------|--------------|------------------------------------------------------|------------------------------------|--------------------------------------------------------|-----|----------|------------------|----------------------------------|-----------------------------------------------------------------------------------------------------------|-----------|----------------------------------------------------------------------------|
|    |                                |                 |         |              |                                                      | vaccine<br>(I)                     |                                                        |     |          |                  | OCTA,<br>FFA                     |                                                                                                           |           | 20/20 with no<br>treatment                                                 |
|    |                                |                 |         | 91<br>(M)    | DM                                                   | mRNA<br>vaccine<br>(II)            | 4 weeks                                                | RE  | NR       | 20/32            | IOP, FE,<br>OCT,<br>OCTA,<br>FFA | Edema +++, SND                                                                                            | BRVO      | Persistent<br>BCVA (20/32)<br>after receiving<br>steroid<br>treatment      |
|    |                                |                 |         | 72<br>(F)    | HTN, HL                                              | mRNA<br>vaccine<br>(II)            | 3 weeks                                                | RE  | NR       | 20/25            | IOP, FE,<br>OCT,<br>OCTA,<br>FFA | Edema +,<br>hemorrhages +,<br>quadrant<br>ischemia,<br>superotemporal<br>branch retinal vein<br>occlusion | BRVO      | BCVA<br>improved<br>(20/20) after<br>receiving<br>steroid<br>treatment     |
|    |                                |                 |         | 88<br>(M)    | HTN, HL,<br>CVD,<br>Alzheimer,<br>Prostate<br>cancer | mRNA<br>vaccine<br>(II)            | 2 weeks                                                | RE  | NR       | 20/125           | IOP, FE,<br>OCT,<br>OCTA,<br>FFA | Edema ++,<br>hemorrhages +,<br>hemispheric<br>retinal vein<br>occlusion                                   | HRVO      | Persistent<br>BCVA (20/125)<br>after receiving<br>steroid<br>treatment     |
|    |                                |                 |         | 73<br>(F)    | HTN, HL,<br>CVD, NET                                 | Viral<br>vector<br>vaccine<br>(II) | 4 weeks                                                | RE  | NR       | CF               | IOP, FE,<br>OCT,<br>OCTA,<br>FFA | Edema +,<br>hemorrhages +                                                                                 | CRVO      | Persistent<br>BCVA (CF)<br>after receiving<br>steroid<br>treatment         |
|    |                                |                 |         | 65<br>(F)    | HTN, HL, DM                                          | Viral<br>vector<br>vaccine<br>(I)  | 1 week                                                 | RE  | NR       | 20/40            | IOP, FE,<br>OCT,<br>OCTA,<br>FFA | Edema +, small<br>SND,<br>hemorrhages +                                                                   | CRVO      | BCVA<br>improved<br>(20/32) after<br>receiving<br>steroid<br>treatment     |
|    |                                |                 |         | 72<br>(F)    | HTN, CVD                                             | Viral<br>vector<br>vaccine<br>(I)  | 2 weeks                                                | LE  | NR       | 20/50            | IOP, FE,<br>OCT,<br>OCTA,<br>FFA | Hemorrhages<br>+++, superior<br>quadrants<br>ischemia,<br>hemispheric<br>retinal vein<br>occlusion        | HRVO      | Persistent<br>BCVA (20/50)<br>after receiving<br>laser<br>photocoagulation |

**Abbreviation:** AF, atrial fibrillation; anti-VEGF, anti-vascular endothelial growth factor; BCVA, best corrected visual acuity; BRVO, branch retinal vein occlusion; COVID-19, Coronavirus Disease-19; CRVO, Central retinal vein occlusion; CVD, cardiovascular disease; DM, diabetes mellitus; DME, diabetic macular edema; DVT, deep vein thrombosis; ESRD, End stage renal disease; FA, fluorescein angiography; FE, fundal examination; FFA, Fundus fluorescein angiography; HL, hyperlipidemia; HTN, hypertension; HRVO, hemispheric retinal vein occlusion; IOP, intraocular pressure; LE, left eye; ME, macular edema; NET, neuroendocrine tumour; NR, not reported; NTG,

Normal Tension Glaucoma; OCT, Optical coherence tomography; OCTA, Optical coherence tomography angiography; RE, right eye; RVO, retinal vein occlusion; SAH, subarachnoid hemorrhage; UWPC, ultra-wide-field pseudo-color; VF, visual field;
